# Supplementary material
Source: PubMed Central journal article supplement (PMC6561090)
Supplement: NIHMS1521217-supplement-1.pdf [file NIHMS1521217-supplement-1.pdf]

## Appendix A – Supplementary Materials

### Contents

- Figure A.1a** – Correlation between maternal prenatal toenail Hg and fish/seafood consumption
- Figure A.1b** - Correlation between maternal prenatal toenail Hg and presence of silver-mercury amalgam dental fillings
- Table A.1** - Sex stratified adjusted relative risks (RR) and 95% confidence intervals (CI)...
- Table A.2** - Prenatal exposure to *in utero* Hg exposure and immune markers in offspring

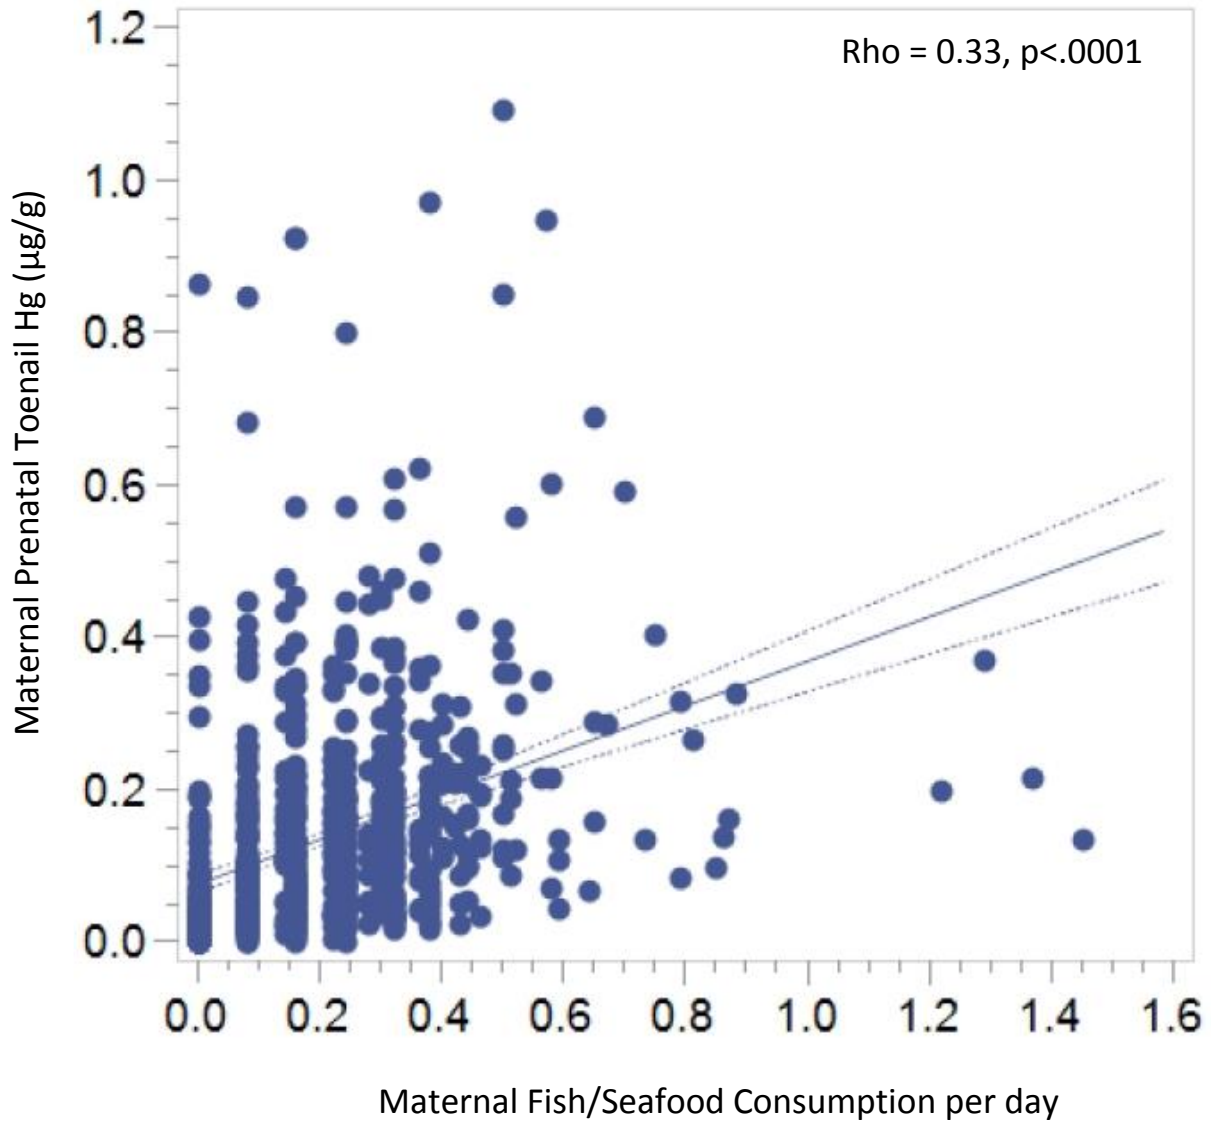

**Figure A.1a.** Correlation between maternal prenatal toenail Hg and fish/seafood consumption. Spearman correlation coefficient (Rho) and p-value derived from correlations between prenatal toenail Hg and self-reported servings of fish per day (n=1,321).

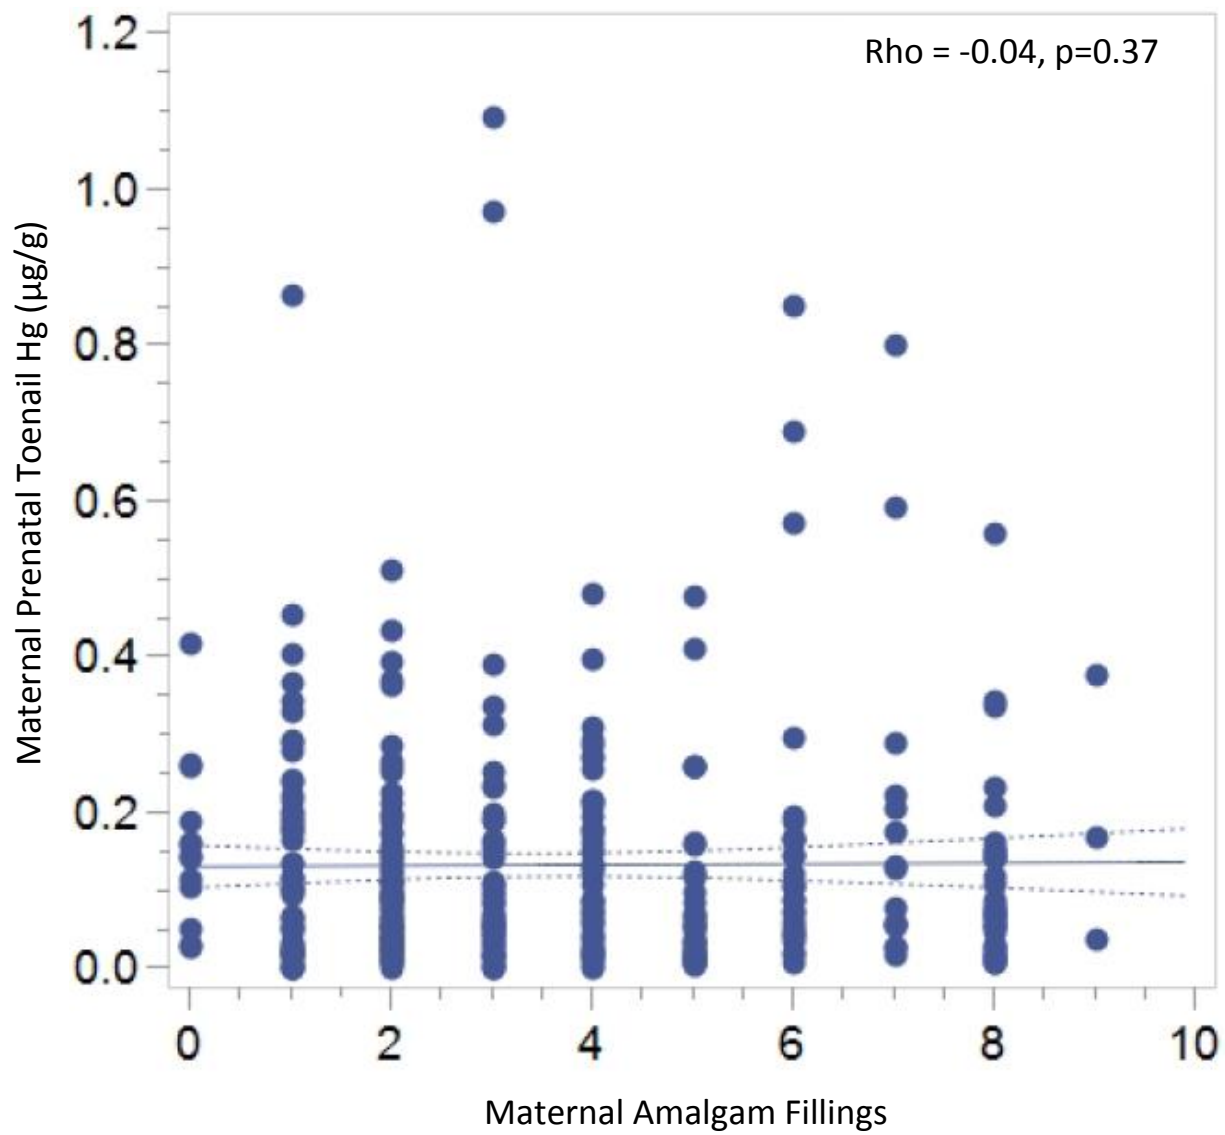

**Figure A.1b.** Correlation between maternal prenatal toenail Hg and presence of silver-mercury amalgam dental fillings. Spearman correlation coefficient (Rho) and p-value derived from correlations between self-reported number of amalgam fillings and prenatal maternal toenail Hg (n=616).

**Table A.1** Sex stratified adjusted relative risks (RR) and 95% confidence intervals (CI) of infant respiratory infections and symptoms requiring a doctor visit, and any allergies confirmed by a doctor in the first year of life in relation to a doubling of prenatal maternal toenail Hg concentrations among mothers who consumed fish or seafood.

| Girls                       |                    |     |           |                    |     |           |                     |            |                    |                       |     |           |
|-----------------------------|--------------------|-----|-----------|--------------------|-----|-----------|---------------------|------------|--------------------|-----------------------|-----|-----------|
| Outcome                     | 0-4 months (n=303) |     |           | 5-8 months (n=314) |     |           | 9-12 months (n=313) |            |                    | Over the year (n=344) |     |           |
|                             | Events (n)         | RR  | 95% CI    | Events (n)         | RR  | 95% CI    | Events (n)          | RR         | 95% CI             | Events (n)            | RR  | 95% CI    |
| Upper Respiratory Infection | 74                 | 1.0 | (0.9-1.2) | 131                | 1.0 | (0.9-1.1) | 183                 | 1.0        | (0.9-1.2)          | 388                   | 1.0 | (1.0-1.1) |
| Lower Respiratory Infection | 6                  | 0.5 | (0.3-1.0) | 20                 | 0.9 | (0.7-1.0) | 10                  | 1.3        | (0.9-1.9)          | 36                    | 0.9 | (0.7-1.2) |
| Respiratory Symptoms        | 37                 | 1.0 | (0.8-1.4) | 77                 | 1.0 | (0.9-1.3) | 50                  | 1.3        | (1.0-1.6)          | 164                   | 1.1 | (1.0-1.3) |
| Eczema                      | 5                  | 1.0 | (0.5-2.2) | 13                 | 0.7 | (0.5-1.1) | 7                   | 0.8        | (0.5-1.4)          | 25                    | 0.8 | (0.7-1.0) |
| Wheeze                      | 6                  | 1.0 | (0.6-1.9) | 15                 | 0.9 | (0.6-1.2) | 7                   | 1.4        | (0.7-2.7)          | 28                    | 1.0 | (0.8-1.3) |
| Allergy                     | 3                  | 1.7 | (0.7-4.4) | 7                  | 0.9 | (0.5-1.7) | 5                   | 1.6        | (0.7-3.5)          | 15                    | 1.2 | (0.9-1.6) |
| Boys                        |                    |     |           |                    |     |           |                     |            |                    |                       |     |           |
| Outcome                     | 0-4 months (n=336) |     |           | 5-8 months (n=331) |     |           | 9-12 months (n=319) |            |                    | Over the year (n=362) |     |           |
|                             | Events (n)         | RR  | 95% CI    | Events (n)         | RR  | 95% CI    | Events (n)          | RR         | 95% CI             | Events (n)            | RR  | 95% CI    |
| Upper Respiratory Infection | 84                 | 1.0 | (0.8-1.1) | 174                | 1.0 | (0.9-1.1) | 197                 | 1.0        | (0.9-1.1)          | 455                   | 1.0 | (0.9-1.1) |
| Lower Respiratory Infection | 24                 | 0.8 | (0.6-1.0) | 39                 | 1.0 | (0.7-1.3) | 14                  | <b>1.6</b> | <b>(1.2-2.4)**</b> | 77                    | 0.9 | (0.8-1.2) |
| Respiratory Symptoms        | 56                 | 0.9 | (0.7-1.1) | 101                | 1.0 | (0.9-1.2) | 95                  | 1.1        | (0.9-1.4)          | 252                   | 1.0 | (0.9-1.2) |
| Eczema                      | 10                 | 1.1 | (0.6-2.0) | 29                 | 1.3 | (0.9-1.9) | 18                  | 0.9        | (0.6-1.4)          | 57                    | 1.1 | (0.8-1.5) |
| Wheeze                      | 13                 | 0.8 | (0.5-1.2) | 18                 | 1.1 | (0.8-1.7) | 19                  | 1.1        | (0.7-1.6)          | 50                    | 1.0 | (0.8-1.2) |
| Allergy*                    | 3                  | 1.3 | (0.4-4.0) | 10                 | 1.3 | (0.7-2.4) | 15                  | 0.7        | (0.5-1.2)          | 28                    | 0.9 | (0.7-1.2) |

Models were adjusted for maternal age, parity, smoking, education, dietary index and fish intake, infant sex, gestational age, birthweight, feeding at month 4, 8, 12 and day care attendance at month 4,8,12. Sample sizes for eczema were n=288/321 at 0-4 months for girls/boys, n=310/n=330 at 5-8 months for girls/boys, n=359 for boys at 9-12 months due to missing data. Sample size for allergy confirmed by doctor for girls/boys n=301/335 due to missing data. \*In girls, models for allergy were only adjusted for maternal and gestational age whereas in boys models for allergy were run without daycare and feeding covariates in order to achieve model convergence.

\*\*p < 0.01

**Table A.2.** Prenatal exposure to *in utero* Hg exposure and immune markers in offspring.

| <b>Reference</b>                     | <b>Hg exposure:<br/>(source,<br/>time, level)</b>                      | <b>Study, Design (n)</b>                                          | <b>Results</b>                                                                                                                                                                                                                                                                                                                      | <b>Potential confounders<br/>considered in the analysis,<br/>other comments</b> |
|--------------------------------------|------------------------------------------------------------------------|-------------------------------------------------------------------|-------------------------------------------------------------------------------------------------------------------------------------------------------------------------------------------------------------------------------------------------------------------------------------------------------------------------------------|---------------------------------------------------------------------------------|
| <b>Immune Biomarkers in Newborns</b> |                                                                        |                                                                   |                                                                                                                                                                                                                                                                                                                                     |                                                                                 |
| Cardenas et al 2015 <sup>1</sup>     | Maternal toenail, postpartum, median µg/g: 0.07 (range: 0.001-1.44)    | New Hampshire Birth Cohort Study, (n=138 maternal/infant pairs)   | % change of white blood cell proportion inferred from DNA methylation:<br>-2.5% (95% CI: -5.0, -1.0) monocytes<br>3.5% (95% CI: 1.0, 7.0) B cells in girls only                                                                                                                                                                     | Maternal age, infant sex, other white blood cell proportions                    |
| Nyland et al 2011 <sup>2</sup>       | Umbilical cord blood, geometric mean µg/g: 9.63 (range: 0.08 to 77.80) | Amazon region, Cross-sectional study (n=61 maternal/infant pairs) | Serum IgG at birth:<br>$r=0.61$ (95% CI: 0.21, 1.02)<br><br>Total serum antinuclear antibodies at birth:<br>OR <sub>adj</sub> 0.67 (95% CI: 0.41, 1.10) and<br>IgG OR <sub>adj</sub> 0.62 (95% CI: 0.37, 1.05)<br><br>Serum cytokines (IL-1 $\beta$ , IL-6, TNF $\alpha$ ) at birth: no association with cord blood mercury levels. | Maternal age, education level and residence and child sex                       |

| Reference                             | Hg exposure:<br>(source, time, level)                                                                               | Study, Design (n)                                                                                                 | Results                                                                                                                                                                                                                                                                                                                                                                         | Potential confounders considered in the analysis, other comments |
|---------------------------------------|---------------------------------------------------------------------------------------------------------------------|-------------------------------------------------------------------------------------------------------------------|---------------------------------------------------------------------------------------------------------------------------------------------------------------------------------------------------------------------------------------------------------------------------------------------------------------------------------------------------------------------------------|------------------------------------------------------------------|
| Belles-Isles et al. 2002 <sup>3</sup> | Umbilical cord blood, geometric mean nmol/L, 95% CI: Exposed group: 9.1 (7.2, 11.3) Reference group: 4.5 (3.9, 5.2) | Quebec, Canada cross sectional study (n=108, 48 from remote subsistence fishing population, 60 from urban center) | Newborn naïve T helper cells (CD4+CD45RA+):<br>$r = -0.27; p = 0.008$<br><br>Newborn Natural Killer cell cytolytic activity: no difference between groups<br><br>Newborn plasma IgM:<br>$r = -0.27; p = 0.008$<br><br>Decreased <i>in vitro</i> lymphocyte proliferation ( $p < 0.05$ ) in cord blood samples from subsistence fishing populations compared to urban population | Smoking during pregnancy                                         |
| Bilrha et al. 2003 <sup>4</sup>       | Umbilical cord blood                                                                                                | Quebec, Canada cross sectional study (n=112, 47 from remote subsistence fishing population, 65 from urban center) | <i>In vitro</i> expression of activation markers following mitogen stimulation of lymphocytes similar between the two groups.<br><br>TNF- $\alpha$ but not IL-10 secretion following lymphocyte activation was suppressed in subsistence fishing group.                                                                                                                         | Effect may be due to organochlorines rather than mercury         |

---

**Immune Biomarkers in Children, Age 5 to 16 years**

---

| <b>Reference</b>                 | <b>Hg exposure:<br/>(source, time, level)</b>                                                                            | <b>Study, Design (n)</b>                          | <b>Results</b>                                                                                                                                                                                                                                                                                                           | <b>Potential confounders considered in the analysis, other comments</b>                                                                                                                        |
|----------------------------------|--------------------------------------------------------------------------------------------------------------------------|---------------------------------------------------|--------------------------------------------------------------------------------------------------------------------------------------------------------------------------------------------------------------------------------------------------------------------------------------------------------------------------|------------------------------------------------------------------------------------------------------------------------------------------------------------------------------------------------|
| Oulhote et al. 2017 <sup>5</sup> | Maternal Blood, geometric (mean, range) ug/L: 3.1, 0.53-20.0, maternal Hair: 0.7, 0.1-3.9, and cord-blood: 4.6, 0.8-21.1 | Faroe Islands cohort 2007-2009 (n=54).            | White blood cell counts at age 5; a one standard deviation (SD) increase in Hg was associated with a decrease by 23% SD (95%CI: -43, -4) in lymphocytes (including T cells, NK cells, and B cells)<br><br>No associations between prenatal mercury and neutrophils, eosinophils, basophils, and monocytes were observed. | Age at examination (months), sex, parity (no older sibling vs. 1 or more older siblings), maternal smoking during pregnancy, birth weight (g) and duration of breastfeeding (< or ≥ 6 months). |
| Hui et al. 2016 <sup>6</sup>     | Umbilical cord blood, median (interquartile range) 46.1 (33.1-65.1) nmol/L                                               | Chinese mercury birth cohort, prospective (n=407) | Serum cytokines at age 6-9<br>Regression coefficient (95%CI):<br>IL-4: 0.03 (-0.09, 0.16)<br>IL-5: -0.04 (-0.12, 0.03)<br>IL-6: -0.17 (-0.31, -0.03)<br>IL-8: -0.10 (-0.26, 0.06)<br>IL-10: -0.01 (-0.15, 0.13)<br>IL-13: -0.00 (-0.09, 0.08)<br>TNFα: -0.09 (-0.20, 0.02)                                               | Sex, age, parental education and fish consumption during pregnancy                                                                                                                             |

| Reference                          | Hg exposure: (source, time, level)                                                             | Study, Design (n)                         | Results                                                                                                                                                                                                                                                                                                                                                                                                                                                                                        | Potential confounders considered in the analysis, other comments                                                                                                                                                                                                  |
|------------------------------------|------------------------------------------------------------------------------------------------|-------------------------------------------|------------------------------------------------------------------------------------------------------------------------------------------------------------------------------------------------------------------------------------------------------------------------------------------------------------------------------------------------------------------------------------------------------------------------------------------------------------------------------------------------|-------------------------------------------------------------------------------------------------------------------------------------------------------------------------------------------------------------------------------------------------------------------|
| Grandjean et al. 2010 <sup>7</sup> | Umbilical cord blood, geometric mean (interquartile range) total mercury µg/L: 11.3 (7.4–21.0) | Faroe Islands birth cohort study, (n=464) | Total serum IgE at 7 years: $r_s < 0.2$ ; $p = 0.06$<br><br>Grass specific serum IgE at 7 years: $r_s = -0.17$ ; $p < 0.001$                                                                                                                                                                                                                                                                                                                                                                   | Sex, age season of birth, preterm birth, low birth weight, maternal age, parity, maternal fish intake and smoking during pregnancy, parental smoking at home, daycare attendance, and the child's body mass index (covariates did not affect unadjusted results). |
| Osuna et al. 2014 <sup>8</sup>     | Umbilical cord blood, geometric mean (interquartile range) total mercury µg/L: 31 (11, 64)     | Faroe Islands birth cohort (n=38)         | Serum IgM at age 7 years: 30-53% increase ( $p < 0.05$ ) in IgM concentrations- specific to neural antigens (neurofilaments and astrocyte glial fibrillary acidic protein) per 2 fold increase in blood Hg<br><br>Serum IgG at age 7 years: 60% reduction ( $p < 0.05$ ) in anti-keratin IgG concentrations per 2 fold increase in blood Hg<br><br>No associations were observed between other neural (cholineacetyltransferase, myelin basic protein) or non-neural (actin, desmin) antigens. | Child's sex                                                                                                                                                                                                                                                       |

---

**Clinical Outcomes in Early Childhood Ages 2 to 4 years**

---



| Reference                         | Hg exposure: (source, time, level)                                                                                                                                                                                                 | Study, Design (n)                                                                                               | Results                                                                                                                                                                                                                                                                               | Potential confounders considered in the analysis, other comments                                                                                                                                                                                                                                                              |
|-----------------------------------|------------------------------------------------------------------------------------------------------------------------------------------------------------------------------------------------------------------------------------|-----------------------------------------------------------------------------------------------------------------|---------------------------------------------------------------------------------------------------------------------------------------------------------------------------------------------------------------------------------------------------------------------------------------|-------------------------------------------------------------------------------------------------------------------------------------------------------------------------------------------------------------------------------------------------------------------------------------------------------------------------------|
| Miyake et al. 2011 <sup>9</sup>   | Maternal hair, 29-39 months postpartum*, median ug/g:1.52 (range:0.26-6.05)                                                                                                                                                        | 4 <sup>th</sup> survey of the Osaka Maternal and Child Health Study, cross-sectional (n=582 mother/child pairs) | Wheeze at 29-39 months:<br>OR <sub>adj</sub> = 0.77 (95%CI: 0.41, 1.44) associated with continuous measures of maternal hair mercury levels<br>Eczema at 29-39 months:<br>OR <sub>adj</sub> =0.92 (95%CI: 0.69, 1.21) associated with measures levels of maternal hair mercury levels | Maternal age, residential municipality, parental education and history of allergic disorders, maternal energy-adjusted fish intake during pregnancy, maternal smoking during pregnancy, parity, child's sex, household smoking in same room as child, breastfeeding duration, children's fish intake                          |
| Shaheen et al. 2004 <sup>10</sup> | Umbilical cord blood geometric mean (GM) parts per billion; Phase 1 (n=1755) =0.0127<br>Phase 2 (n=817) = 0.0018<br>20 <sup>th</sup> % method GM=0.54<br>80 <sup>th</sup> Percentile method GM=1.83<br>Interpercentile ratio= 3:38 | Avon Longitudinal Study of Parents and Children (ALSPAC) study, (n=2,044 for wheeze and n=2,173 for eczema)     | Wheeze at 30-42 months:<br>OR <sub>adj</sub> =0.99 (95%CI: 0.89-1.11)<br><br>Eczema at 18-30 months:<br>OR <sub>adj</sub> = 1.03 (95%CI: 0.95-1.12)                                                                                                                                   | Maternal age, parity, smoking during pregnancy, education, ethnic origin, housing status and pre-pregnancy BMI; child's sex, weight, head circumference and crown-heel length at birth; breast feeding and day care use in the first 6 months & other condition (e.g., other symptom or atopic diagnosis (wheeze or eczema)). |

| Reference                                               | Hg exposure:<br>(source, time, level)                                                                                                                 | Study, Design (n)                       | Results                                                                                                                                                                                                                                  | Potential confounders considered in the analysis, other comments                                                                                                                                                                                                  |
|---------------------------------------------------------|-------------------------------------------------------------------------------------------------------------------------------------------------------|-----------------------------------------|------------------------------------------------------------------------------------------------------------------------------------------------------------------------------------------------------------------------------------------|-------------------------------------------------------------------------------------------------------------------------------------------------------------------------------------------------------------------------------------------------------------------|
| <b>Clinical Outcomes in Children Ages 5 to 16 years</b> |                                                                                                                                                       |                                         |                                                                                                                                                                                                                                          |                                                                                                                                                                                                                                                                   |
| Grandjean et al. 2010 <sup>7</sup>                      | Umbilical cord blood geometric mean (interquartile range) total mercury µg/L: 11.3 (7.4–21.0)                                                         | Faroese Birth cohort, (n=464)           | Asthma or atopic eczema at 5 or 7 years [average Hg (interquartile range)] :<br>No allergy 12.8 (7.2 – 21.1)<br>Asthma 14.7 (7.6 – 29.2),<br>p =0.35 (vs no allergy)<br>Atopic dermatitis 13.2 (7.4 – 24.2),<br>p = 0.80 (vs no allergy) | Sex, age season of birth, preterm birth, low birth weight, maternal age, parity, maternal fish intake and smoking during pregnancy, parental smoking at home, daycare attendance, and the child's body mass index (covariates did not affect unadjusted results). |
| Jedrychowski et al. 2011 <sup>11</sup>                  | Umbilical cord blood, 2 <sup>nd</sup> trimester, mean 0.88 µg/dL, 95%CI: 0.81, 0.95<br>Maternal blood at delivery (mean 0.60 µg/dL 95%CI: 0.54, 0.67) | Prospective cohort from Krawkow (n=224) | Atopic status (pin prick test to common allergens at 5 years):<br>Cord blood RR <sub>adj</sub> =1.11 (95%CI:0.68, 1.80)<br>Maternal blood RR <sub>adj</sub> = 0.64 (95%CI:0.28, 1.45)                                                    | Maternal characteristics (age, education, atopy), child's gender, number of older siblings, prenatal (measured via cord blood cotinine) and postnatal environmental tobacco smoke together with exposure to polycyclic aromatic hydrocarbons (PAH).               |

OR<sub>ad</sub>= adjusted odds ratio, RR<sub>adj</sub> = adjusted RR, r = correlation coefficient, r<sub>s</sub>= Spearman correlation coefficient\*Maternal hair postpartum is surrogate for prenatal concentrations.

## References

1. Cardenas A, Koestler DC, Houseman EA, et al. Differential DNA methylation in umbilical cord blood of infants exposed to mercury and arsenic in utero. *Epigenetics* 2015;10:508-15.
2. Nyland JF, Fillion M, Barbosa F, Jr., et al. Biomarkers of methylmercury exposure immunotoxicity among fish consumers in Amazonian Brazil. *Environ Health Perspect* 2011;119:1733-8.
3. Belles-Isles M, Ayotte P, Dewailly E, Weber JP, Roy R. Cord blood lymphocyte functions in newborns from a remote maritime population exposed to organochlorines and methylmercury. *J Toxicol Environ Health A* 2002;65:165-82.
4. Bilrha H, Roy R, Moreau B, Belles-Isles M, Dewailly E, Ayotte P. In vitro activation of cord blood mononuclear cells and cytokine production in a remote coastal population exposed to organochlorines and methyl mercury. *Environ Health Perspect* 2003;111:1952-7.
5. Oulhote Y, Shamim Z, Kielsen K, et al. Children's white blood cell counts in relation to developmental exposures to methylmercury and persistent organic pollutants. *Reproductive Toxicology* 2017;68:207-14.
6. Hui LL, Chan MHM, Lam HS, et al. Impact of fetal and childhood mercury exposure on immune status in children. *Environmental Research* 2016;144:66-72.
7. Grandjean P, Poulsen LK, Heilmann C, Steuerwald U, Weihe P. Allergy and sensitization during childhood associated with prenatal and lactational exposure to marine pollutants. *Environ Health Perspect* 2010;118:1429-33.
8. Osuna CE, Grandjean P, Weihe P, El-Fawal HA. Autoantibodies associated with prenatal and childhood exposure to environmental chemicals in Faroese children. *Toxicol Sci* 2014;142:158-66.
9. Miyake Y, Tanaka K, Yasutake A, Sasaki S, Hirota Y. Lack of association of mercury with risk of wheeze and eczema in Japanese children: The Osaka Maternal and Child Health Study. *Environmental Research* 2011;111:1180-4.
10. Shaheen SO, Newson RB, Henderson AJ, Emmett PM, Sherriff A, Cooke M. Umbilical cord trace elements and minerals and risk of early childhood wheezing and eczema. *European Respiratory Journal* 2004;24:292-7.
11. Jedrychowski W, Perera F, Mauger U, et al. Intrauterine exposure to lead may enhance sensitization to common inhalant allergens in early childhood. A prospective prebirth cohort study *Environmental research* 2011;111:119-24.
